# Supplementary material for: Computational thermochemistry: extension of Benson group additivity approach to organoboron compounds and reliable predictions of their thermochemical properties
Source: Royal Society of Chemistry journal article supplement (doi:10.1039/d2dt02659g), 2022-01-01
Supplement: d2dt02659g1.pdf [file d2dt02659g1.pdf]

Supporting Information for

## **Computational Thermochemistry: Extension of Benson Group Additivity Approach to Organoboron Compounds and Reliable Predictions of their Thermochemical Properties**

Hannu T. Vuori,<sup>a</sup> J. Mikko Rautiainen,<sup>a\*</sup> Erkki T. Kolehmainen,<sup>a</sup> and Heikki M. Tuononen<sup>a\*</sup>

Department of Chemistry, NanoScience Centre, P.O. Box 35, University of Jyväskylä, FI-40014, Finland

[j.mikko.rautiainen@ju.fi](mailto:j.mikko.rautiainen@ju.fi) [heikki.m.tuononen@ju.fi](mailto:heikki.m.tuononen@ju.fi)

**Table S1.** Standard gas phase enthalpies of formation ( $\Delta_f H^\circ$ , 298 K, kJ mol<sup>-1</sup>) and calculated total energies ( $E_{\text{tot}}$ , 0 K, a.u.) of gaseous atoms in their ground state with spin-orbit terms included

| Element | $\Delta_f H^\circ$ 298 K | $E_{\text{tot}}$ 0K (CBS-QB3) | $E_{\text{tot}}$ 0K (W1X-1) |
|---------|--------------------------|-------------------------------|-----------------------------|
| H       | 217.999                  | -0.499818                     | -0.499973                   |
| B       | 570.3                    | -24.601815                    | -24.652107                  |
| C       | 716.67                   | -37.785512                    | -37.850225                  |
| N       | 472.683                  | -54.520537                    | -54.607186                  |
| O       | 249.173                  | -74.987985                    | -75.106205                  |
| F       | 79.39                    | -99.643673                    | -99.804797                  |
| S       | 276.98                   | -397.658246                   | -398.959687                 |
| Cl      | 121.302                  | -459.684931                   | -461.280996                 |

**Table S2.** Point groups and total, internal, and external symmetry numbers ( $\sigma_{\text{tot}}$ ,  $\sigma_{\text{int}}$ , and  $\sigma_{\text{ext}}$ ) of monoboranes **1–3**, diboranes **4**, borinic **5**, boronic **6**, and boric acid derivatives **7**, catecholboranes **8**, aminoboranes **9–11**, thioborane **12**, and borazine **13**

| Molecule  | Chemical Formula <sup>a</sup>                                    | Point Group            | $\sigma_{\text{tot}}$ | $\sigma_{\text{int}}$ | $\sigma_{\text{ext}}$ |
|-----------|------------------------------------------------------------------|------------------------|-----------------------|-----------------------|-----------------------|
| <b>1a</b> | BH <sub>3</sub>                                                  | <i>D</i> <sub>3h</sub> | 6                     | 1                     | 6                     |
| <b>1b</b> | BH <sub>2</sub> Me                                               | <i>C</i> <sub>s</sub>  | 3                     | 3                     | 1                     |
| <b>1c</b> | BH <sub>2</sub> Et                                               | <i>C</i> <sub>1</sub>  | 3                     | 3                     | 1                     |
| <b>1d</b> | BH <sub>2</sub> Vi                                               | <i>C</i> <sub>s</sub>  | 1                     | 1                     | 1                     |
| <b>1e</b> | BH <sub>2</sub> Pr                                               | <i>C</i> <sub>1</sub>  | 3                     | 3                     | 1                     |
| <b>1f</b> | BH <sub>2</sub> <sup>i</sup> Pr                                  | <i>C</i> <sub>s</sub>  | 9                     | 9                     | 1                     |
| <b>1g</b> | BH <sub>2</sub> <sup>t</sup> Bu                                  | <i>C</i> <sub>1</sub>  | 9                     | 9                     | 1                     |
| <b>1h</b> | BH <sub>2</sub> <sup>t</sup> Bu                                  | <i>C</i> <sub>s</sub>  | 81                    | 81                    | 1                     |
| <b>1i</b> | BH <sub>2</sub> Ph                                               | <i>C</i> <sub>2v</sub> | 4                     | 2                     | 2                     |
| <b>2a</b> | BHMe <sub>2</sub>                                                | <i>C</i> <sub>2</sub>  | 18                    | 9                     | 2                     |
| <b>2b</b> | BHEtMe                                                           | <i>C</i> <sub>1</sub>  | 9                     | 9                     | 1                     |
| <b>2c</b> | BHMeVi                                                           | <i>C</i> <sub>s</sub>  | 3                     | 3                     | 1                     |
| <b>2d</b> | BHMePh                                                           | <i>C</i> <sub>s</sub>  | 6                     | 6                     | 1                     |
| <b>2e</b> | BHEt <sub>2</sub>                                                | <i>C</i> <sub>2</sub>  | 18                    | 9                     | 2                     |
| <b>2f</b> | BHEtVi                                                           | <i>C</i> <sub>1</sub>  | 3                     | 3                     | 1                     |
| <b>2g</b> | BHVi <sub>2</sub>                                                | <i>C</i> <sub>2v</sub> | 2                     | 1                     | 2                     |
| <b>2h</b> | BHPhVi                                                           | <i>C</i> <sub>s</sub>  | 2                     | 2                     | 1                     |
| <b>2i</b> | BH <sup>i</sup> Pr <sub>2</sub>                                  | <i>C</i> <sub>2</sub>  | 162                   | 81                    | 2                     |
| <b>2j</b> | BHPh <sub>2</sub>                                                | <i>C</i> <sub>2</sub>  | 8                     | 4                     | 2                     |
| <b>3a</b> | BMe <sub>3</sub>                                                 | <i>C</i> <sub>1</sub>  | 27                    | 27                    | 1                     |
| <b>3b</b> | BEtMe <sub>2</sub>                                               | <i>C</i> <sub>1</sub>  | 27                    | 27                    | 1                     |
| <b>3c</b> | BMe <sub>2</sub> Vi                                              | <i>C</i> <sub>1</sub>  | 9                     | 9                     | 1                     |
| <b>3d</b> | BMe <sub>2</sub> Ph                                              | <i>C</i> <sub>2</sub>  | 36                    | 18                    | 2                     |
| <b>3e</b> | BEtMePh                                                          | <i>C</i> <sub>1</sub>  | 18                    | 18                    | 1                     |
| <b>3f</b> | BMeVi <sub>2</sub>                                               | <i>C</i> <sub>s</sub>  | 3                     | 3                     | 1                     |
| <b>3g</b> | BMePhVi                                                          | <i>C</i> <sub>1</sub>  | 6                     | 6                     | 1                     |
| <b>3h</b> | BMePh <sub>2</sub>                                               | <i>C</i> <sub>1</sub>  | 12                    | 12                    | 1                     |
| <b>3i</b> | BF <sub>2</sub> Me                                               | <i>C</i> <sub>s</sub>  | 3                     | 3                     | 1                     |
| <b>3j</b> | BEt <sub>3</sub>                                                 | <i>C</i> <sub>3h</sub> | 162                   | 27                    | 6                     |
| <b>3k</b> | BEtVi <sub>2</sub>                                               | <i>C</i> <sub>1</sub>  | 3                     | 3                     | 1                     |
| <b>3l</b> | BEtF <sub>2</sub>                                                | <i>C</i> <sub>s</sub>  | 3                     | 3                     | 1                     |
| <b>3m</b> | BVi <sub>3</sub>                                                 | <i>C</i> <sub>3h</sub> | 6                     | 1                     | 6                     |
| <b>3n</b> | BPhVi <sub>2</sub>                                               | <i>C</i> <sub>1</sub>  | 2                     | 2                     | 1                     |
| <b>3o</b> | BPh <sub>2</sub> Vi                                              | <i>C</i> <sub>1</sub>  | 4                     | 4                     | 1                     |
| <b>3p</b> | BF <sub>2</sub> Vi                                               | <i>C</i> <sub>s</sub>  | 1                     | 1                     | 1                     |
| <b>3q</b> | B <sup>i</sup> Pr <sub>3</sub>                                   | <i>C</i> <sub>3h</sub> | 4374                  | 729                   | 6                     |
| <b>3r</b> | BBu <sub>3</sub>                                                 | <i>C</i> <sub>3h</sub> | 162                   | 27                    | 6                     |
| <b>3s</b> | BPh <sub>3</sub>                                                 | <i>D</i> <sub>3</sub>  | 48                    | 8                     | 6                     |
| <b>3t</b> | BF <sub>3</sub>                                                  | <i>D</i> <sub>3h</sub> | 6                     | 1                     | 6                     |
| <b>3u</b> | BCl <sub>3</sub>                                                 | <i>D</i> <sub>3h</sub> | 6                     | 1                     | 6                     |
| <b>4a</b> | B <sub>2</sub> H <sub>6</sub>                                    | <i>D</i> <sub>2h</sub> | 4                     | 1                     | 4                     |
| <b>4b</b> | B <sub>2</sub> H <sub>5</sub> Me                                 | <i>C</i> <sub>s</sub>  | 3                     | 3                     | 1                     |
| <b>4c</b> | 1,1-B <sub>2</sub> H <sub>4</sub> Me <sub>2</sub>                | <i>C</i> <sub>2v</sub> | 18                    | 9                     | 2                     |
| <b>4d</b> | 1,2- <i>cis</i> -B <sub>2</sub> H <sub>4</sub> Me <sub>2</sub>   | <i>C</i> <sub>2v</sub> | 18                    | 9                     | 2                     |
| <b>4e</b> | 1,2- <i>trans</i> -B <sub>2</sub> H <sub>4</sub> Me <sub>2</sub> | <i>C</i> <sub>2h</sub> | 18                    | 9                     | 2                     |
| <b>4f</b> | B <sub>2</sub> H <sub>3</sub> Me <sub>3</sub>                    | <i>C</i> <sub>s</sub>  | 27                    | 27                    | 1                     |
| <b>4g</b> | B <sub>2</sub> H <sub>2</sub> Me <sub>4</sub>                    | <i>D</i> <sub>2h</sub> | 324                   | 81                    | 4                     |
| <b>5a</b> | BH <sub>2</sub> OH                                               | <i>C</i> <sub>s</sub>  | 1                     | 1                     | 1                     |
| <b>5b</b> | BH <sub>2</sub> (OMe)                                            | <i>C</i> <sub>s</sub>  | 3                     | 3                     | 1                     |
| <b>5c</b> | BH <sub>2</sub> (OEt)                                            | <i>C</i> <sub>1</sub>  | 3                     | 3                     | 1                     |
| <b>5d</b> | BH <sub>2</sub> (OPh)                                            | <i>C</i> <sub>1</sub>  | 2                     | 2                     | 1                     |
| <b>5e</b> | BHMe(OH)                                                         | <i>C</i> <sub>s</sub>  | 3                     | 3                     | 1                     |
| <b>5f</b> | BHEt(OH)                                                         | <i>C</i> <sub>s</sub>  | 3                     | 3                     | 1                     |
| <b>5g</b> | BHPh(OH)                                                         | <i>C</i> <sub>s</sub>  | 2                     | 2                     | 1                     |
| <b>5h</b> | BHMe(OMe)                                                        | <i>C</i> <sub>s</sub>  | 9                     | 9                     | 1                     |

Table S2. Continued.

| Molecule | Chemical Formula <sup>a</sup>                                         | Point Group | $\sigma_{\text{tot}}$ | $\sigma_{\text{int}}$ | $\sigma_{\text{ext}}$ |
|----------|-----------------------------------------------------------------------|-------------|-----------------------|-----------------------|-----------------------|
| 5i       | BHt(OMe)                                                              | $C_s$       | 9                     | 9                     | 1                     |
| 5j       | BHPh(OMe)                                                             | $C_s$       | 6                     | 6                     | 1                     |
| 5k       | BMe <sub>2</sub> (OH)                                                 | $C_1$       | 9                     | 9                     | 1                     |
| 5l       | BMe <sub>2</sub> (OMe)                                                | $C_s$       | 27                    | 27                    | 1                     |
| 5m       | BEtMe(OH)                                                             | $C_1$       | 9                     | 9                     | 1                     |
| 5n       | BMePh(OH)                                                             | $C_s$       | 6                     | 6                     | 1                     |
| 5o       | BMePh(OMe)                                                            | $C_s$       | 18                    | 18                    | 1                     |
| 6a       | BH(OH) <sub>2</sub>                                                   | $C_s$       | 2                     | 2                     | 1                     |
| 6b       | BH(OMe) <sub>2</sub>                                                  | $C_s$       | 9                     | 9                     | 1                     |
| 6c       | BH( <sup>i</sup> PrO) <sub>2</sub>                                    | $C_{2v}$    | 162                   | 81                    | 2                     |
| 6d       | BMe(OH) <sub>2</sub>                                                  | $C_s$       | 3                     | 3                     | 1                     |
| 6e       | BMe(OH)(OMe)                                                          | $C_s$       | 9                     | 9                     | 1                     |
| 6f       | BMe(OMe) <sub>2</sub>                                                 | $C_s$       | 27                    | 27                    | 1                     |
| 6g       | BMe(OEt)(OMe)                                                         | $C_s$       | 27                    | 27                    | 1                     |
| 6h       | BMe(OEt) <sub>2</sub>                                                 | $C_s$       | 27                    | 27                    | 1                     |
| 6i       | BEt(OH) <sub>2</sub>                                                  | $C_s$       | 3                     | 3                     | 1                     |
| 6j       | BEt(OH)(OMe)                                                          | $C_s$       | 9                     | 9                     | 1                     |
| 6k       | BEt(OMe) <sub>2</sub>                                                 | $C_s$       | 27                    | 27                    | 1                     |
| 6l       | BVi(OH) <sub>2</sub>                                                  | $C_s$       | 1                     | 1                     | 1                     |
| 6m       | BVi(OH)(OMe)                                                          | $C_s$       | 3                     | 3                     | 1                     |
| 6n       | BVi(OMe) <sub>2</sub>                                                 | $C_s$       | 9                     | 9                     | 1                     |
| 6o       | B(AlI)(OH) <sub>2</sub>                                               | $C_1$       | 1                     | 1                     | 1                     |
| 6p       | B(AlI)(OH)(OMe)                                                       | $C_1$       | 3                     | 3                     | 1                     |
| 6q       | B(AlI)(OMe) <sub>2</sub>                                              | $C_1$       | 9                     | 9                     | 1                     |
| 6r       | BPh(OH) <sub>2</sub>                                                  | $C_1$       | 2                     | 2                     | 1                     |
| 6s       | BPh(OH)(OMe)                                                          | $C_1$       | 6                     | 6                     | 1                     |
| 6t       | BPh(OMe) <sub>2</sub>                                                 | $C_1$       | 18                    | 18                    | 1                     |
| 6u       | B( <i>p</i> -Tol)(OH) <sub>2</sub>                                    | $C_1$       | 6                     | 6                     | 1                     |
| 6v       | B( <i>p</i> -Tol)(OH)(OMe)                                            | $C_1$       | 18                    | 18                    | 1                     |
| 6w       | B( <i>p</i> -Tol)(OMe) <sub>2</sub>                                   | $C_1$       | 54                    | 54                    | 1                     |
| 7a       | B(OH) <sub>3</sub>                                                    | $C_{3h}$    | 6                     | 1                     | 6                     |
| 7b       | B(OH) <sub>2</sub> (OMe)                                              | $C_s$       | 3                     | 3                     | 1                     |
| 7c       | B(OH) <sub>2</sub> (OPh)                                              | $C_1$       | 2                     | 2                     | 1                     |
| 7d       | B(OH)(OMe) <sub>2</sub>                                               | $C_s$       | 9                     | 9                     | 1                     |
| 7e       | B(OH)(OMe)(OPh)                                                       | $C_1$       | 6                     | 6                     | 1                     |
| 7f       | B(OMe) <sub>3</sub>                                                   | $C_{3h}$    | 162                   | 27                    | 6                     |
| 7g       | B(OEt)(OMe) <sub>2</sub>                                              | $C_s$       | 27                    | 27                    | 1                     |
| 7h       | B(OMe) <sub>2</sub> (OPh)                                             | $C_1$       | 18                    | 18                    | 1                     |
| 7i       | B(OEt) <sub>2</sub> (OMe)                                             | $C_s$       | 27                    | 27                    | 1                     |
| 7j       | B(OMe)(OPh) <sub>2</sub>                                              | $C_1$       | 12                    | 12                    | 1                     |
| 7k       | B(OEt) <sub>3</sub>                                                   | $C_{3h}$    | 162                   | 27                    | 6                     |
| 8a       | C <sub>6</sub> H <sub>4</sub> O <sub>2</sub> BH                       | $C_{2v}$    | 2                     | 1                     | 2                     |
| 8b       | C <sub>6</sub> H <sub>4</sub> O <sub>2</sub> BMe                      | $C_s$       | 3                     | 3                     | 1                     |
| 8c       | 3-C <sub>6</sub> H <sub>3</sub> FO <sub>2</sub> BMe                   | $C_1$       | 3                     | 3                     | 1                     |
| 8d       | 4-C <sub>6</sub> H <sub>3</sub> FO <sub>2</sub> BMe                   | $C_1$       | 3                     | 3                     | 1                     |
| 8e       | 3,4-C <sub>6</sub> H <sub>2</sub> F <sub>2</sub> O <sub>2</sub> BMe   | $C_1$       | 3                     | 3                     | 1                     |
| 8f       | 3,5-C <sub>6</sub> H <sub>2</sub> F <sub>2</sub> O <sub>2</sub> BMe   | $C_1$       | 3                     | 3                     | 1                     |
| 8g       | 3,6-C <sub>6</sub> H <sub>2</sub> F <sub>2</sub> O <sub>2</sub> BMe   | $C_s$       | 3                     | 3                     | 1                     |
| 8h       | 4,5-C <sub>6</sub> H <sub>2</sub> F <sub>2</sub> O <sub>2</sub> BMe   | $C_s$       | 3                     | 3                     | 1                     |
| 8i       | 3,4,5-C <sub>6</sub> H <sub>2</sub> F <sub>2</sub> O <sub>2</sub> BMe | $C_1$       | 3                     | 3                     | 1                     |
| 8j       | 3,4,6-C <sub>6</sub> H <sub>2</sub> F <sub>2</sub> O <sub>2</sub> BMe | $C_1$       | 3                     | 3                     | 1                     |
| 8k       | C <sub>6</sub> F <sub>4</sub> O <sub>2</sub> BMe                      | $C_s$       | 3                     | 3                     | 1                     |
| 9a       | BH <sub>2</sub> NH <sub>2</sub>                                       | $C_{2v}$    | 2                     | 1                     | 2                     |
| 9b       | BH <sub>2</sub> NHMe                                                  | $C_s$       | 3                     | 3                     | 1                     |
| 9c       | BH <sub>2</sub> NMe <sub>2</sub>                                      | $C_{2v}$    | 18                    | 9                     | 2                     |

Table S2. Continued.

| Molecule | Chemical Formula <sup>a</sup>                | Point Group     | $\sigma_{\text{tot}}$ | $\sigma_{\text{int}}$ | $\sigma_{\text{ext}}$ |
|----------|----------------------------------------------|-----------------|-----------------------|-----------------------|-----------------------|
| 9d       | BHMeNH <sub>2</sub>                          | C <sub>s</sub>  | 3                     | 3                     | 1                     |
| 9e       | BMe <sub>2</sub> NH <sub>2</sub>             | C <sub>2v</sub> | 18                    | 9                     | 2                     |
| 10       | BH(NMe <sub>2</sub> ) <sub>2</sub>           | C <sub>2</sub>  | 162                   | 81                    | 2                     |
| 11       | B(NMe <sub>2</sub> ) <sub>3</sub>            | D <sub>3</sub>  | 4372                  | 729                   | 6                     |
| 12       | B(SMe) <sub>3</sub>                          | C <sub>3h</sub> | 162                   | 27                    | 6                     |
| 13       | B <sub>3</sub> N <sub>3</sub> H <sub>6</sub> | D <sub>3h</sub> | 6                     | 1                     | 6                     |

<sup>a</sup> Used abbreviations: Me = methyl, Et = ethyl, Pr = propyl, <sup>i</sup>Pr = isopropyl, Bu = butyl, <sup>s</sup>Bu = sec-butyl, <sup>t</sup>Bu = tert-butyl, Vi = vinyl, All = allyl, Ph = phenyl, *p*-Tol = *para*-tolyl.

**Table S3.** Calculated total energies ( $E_{\text{tot}}$ , 0 K, a.u.), zero-point vibrational energies (ZPE, a.u.), absolute enthalpies (H, 298 K, a.u.), thermal corrections to enthalpies ( $\Delta H$ , 0–298 K, a.u.), and gas phase standard enthalpies of formation ( $\Delta_f H^\circ$ , 298 K,  $\text{kJ mol}^{-1}$ ) of monoboranes **1–3**, diboranes **4**, borinic **5**, boronic **6**, and boric acid derivatives **7**, catecholboranes **8**, aminoboranes **9–11**, thioborane **12**, and borazine **13**

| Molecule  | Chemical Formula <sup>a</sup>                                    | CBS-QB3      |                          |                      | W1X-1    |                    |                          |
|-----------|------------------------------------------------------------------|--------------|--------------------------|----------------------|----------|--------------------|--------------------------|
|           |                                                                  | H 298 K      | $\Delta_f H^\circ$ 298 K | $E_{\text{tot}}$ 0 K | ZPE      | $\Delta H$ 0–298 K | $\Delta_f H^\circ$ 298 K |
| <b>1a</b> | BH <sub>3</sub>                                                  | -26.518655   | 103.7                    | -26.598997           | 0.025851 | 0.029682           | 103.9                    |
| <b>1b</b> | BH <sub>2</sub> Me                                               | -65.761246   | 36.7                     | -65.938283           | 0.054675 | 0.059545           | 32.2                     |
| <b>1c</b> | BH <sub>2</sub> Et                                               | -104.981826  | 27.6                     | -105.253988          | 0.082947 | 0.088959           | 21.3                     |
| <b>1d</b> | BH <sub>2</sub> Vi                                               | -103.777481  | 141.4                    | -104.027165          | 0.061711 | 0.066868           | 135.3                    |
| <b>1e</b> | BH <sub>2</sub> <sup>i</sup> Pr                                  | -144.206534  | 7.6                      | -144.573721          | 0.110960 | 0.118209           | -0.7                     |
| <b>1f</b> | BH <sub>2</sub> <sup>s</sup> Bu                                  | -144.205293  | 10.8                     | -144.572057          | 0.110926 | 0.118002           | 3.2                      |
| <b>1g</b> | BH <sub>2</sub> <sup>t</sup> Bu                                  | -183.429488  | -7.8                     | -183.891620          | 0.138665 | 0.147800           | -16.9                    |
| <b>1h</b> | BH <sub>2</sub> Ph                                               | -183.432122  | -14.7                    | -183.893055          | 0.138627 | 0.147073           | -22.6                    |
| <b>1i</b> | BHMe <sub>2</sub>                                                | -257.151106  | 172.5                    | -257.711858          | 0.109744 | 0.116701           | 160.9                    |
| <b>2a</b> | BHEtMe                                                           | -105.004181  | -31.1                    | -105.277452          | 0.082864 | 0.089190           | -39.7                    |
| <b>2b</b> | BHMeVi                                                           | -144.224729  | -40.2                    | -144.593118          | 0.111107 | 0.118673           | -50.4                    |
| <b>2c</b> | BHMePh                                                           | -143.020269  | 74.0                     | -143.365958          | 0.089510 | 0.096380           | 64.0                     |
| <b>2d</b> | BHEt <sub>2</sub>                                                | -296.393341  | 106.5                    | -297.049883          | 0.137506 | 0.146252           | 91.8                     |
| <b>2e</b> | BHEtVi                                                           | -183.445069  | -48.7                    | -183.908629          | 0.139455 | 0.148233           | -60.4                    |
| <b>2f</b> | BHVi <sub>2</sub>                                                | -182.240707  | 65.2                     | -182.681407          | 0.117687 | 0.125763           | 53.7                     |
| <b>2g</b> | BHPhVi                                                           | -181.036639  | 178.3                    | -181.454617          | 0.096136 | 0.103408           | 166.9                    |
| <b>2h</b> | BH <sup>i</sup> Pr <sub>2</sub>                                  | -334.409716  | 210.8                    | -335.138434          | 0.143931 | 0.153289           | 195.0                    |
| <b>2i</b> | BHPh <sub>2</sub>                                                | -261.892520  | -83.5                    | -262.545441          | 0.195543 | 0.206995           | -96.7                    |
| <b>2j</b> | BMe <sub>3</sub>                                                 | -487.780504  | 249.3                    | -488.819557          | 0.191540 | 0.203072           | 229.8                    |
| <b>3a</b> | BEtMe <sub>2</sub>                                               | -144.246655  | -97.8                    | -144.615676          | 0.110523 | 0.118688           | -109.6                   |
| <b>3b</b> | BMe <sub>2</sub> Vi                                              | -183.467636  | -108.0                   | -183.931747          | 0.138944 | 0.148181           | -121.3                   |
| <b>3c</b> | BMe <sub>2</sub> Ph                                              | -182.261487  | 10.6                     | -182.702714          | 0.117199 | 0.125736           | -2.3                     |
| <b>3d</b> | BEtMePh                                                          | -335.634483  | 43.3                     | -336.386409          | 0.165072 | 0.175644           | 26.1                     |
| <b>3e</b> | BMeVi <sub>2</sub>                                               | -374.854927  | 34.5                     | -375.701870          | 0.193251 | 0.205190           | 16.1                     |
| <b>3f</b> | BMePhVi                                                          | -220.276147  | 119.5                    | -220.789522          | 0.123611 | 0.132765           | 105.4                    |
| <b>3g</b> | BMePh <sub>2</sub>                                               | -373.649255  | 151.9                    | -374.473261          | 0.171501 | 0.182671           | 133.7                    |
| <b>3h</b> | BF <sub>2</sub> Me                                               | -527.022255  | 184.5                    | -528.156224          | 0.218896 | 0.232292           | 163.3                    |
| <b>3i</b> | BEt <sub>3</sub>                                                 | -264.264391  | -806.1                   | -264.754300          | 0.045190 | 0.050949           | -809.4                   |
| <b>3j</b> | BEtVi <sub>2</sub>                                               | -261.909264  | -127.5                   | -262.563402          | 0.195538 | 0.207215           | -143.3                   |
| <b>3k</b> | BEtF <sub>2</sub>                                                | -259.496064  | 112.1                    | -260.104453          | 0.151927 | 0.162089           | 96.3                     |
| <b>3l</b> | BVi <sub>3</sub>                                                 | -303.484775  | -814.8                   | -304.069684          | 0.073594 | 0.080541           | -819.0                   |
| <b>3m</b> | BPhVi <sub>2</sub>                                               | -258.290790  | 228.4                    | -258.876157          | 0.129900 | 0.139746           | 213.5                    |
| <b>3n</b> | BPh <sub>2</sub> Vi                                              | -411.663842  | 260.9                    | -412.559512          | 0.177674 | 0.189378           | 242.1                    |
| <b>3o</b> | BF <sub>2</sub> Vi                                               | -565.038244  | 289.9                    | -566.243899          | 0.225192 | 0.239147           | 268.4                    |
| <b>3p</b> | B <sup>i</sup> Pr <sub>3</sub>                                   | -302.276993  | -691.9                   | -302.838603          | 0.051521 | 0.057696           | -695.8                   |
| <b>3q</b> | BBu <sub>3</sub>                                                 | -379.579738  | -177.9                   | -380.517689          | 0.279942 | 0.295776           | -194.1                   |
| <b>3r</b> | BPh <sub>3</sub>                                                 | -497.257983  | -248.7                   | -498.481733          | 0.362801 | 0.382822           | -274.6                   |
| <b>3s</b> | BF <sub>3</sub>                                                  | -718.413257  | 317.3                    | -719.928727          | 0.272613 | 0.288855           | 293.3                    |
| <b>3t</b> | BCl <sub>3</sub>                                                 | -324.263198  | -1133.9                  | -324.813829          | 0.012208 | 0.016678           | -1134.6                  |
| <b>3u</b> | B <sub>2</sub> H <sub>6</sub>                                    | -1404.159723 | -411.5                   | -1409.008236         | 0.007402 | 0.012774           | -404.3                   |
| <b>4a</b> | B <sub>2</sub> H <sub>5</sub> Me                                 | -53.098420   | 46.9                     | -53.268819           | 0.061943 | 0.066508           | 40.6                     |
| <b>4b</b> | 1,1-B <sub>2</sub> H <sub>4</sub> Me <sub>2</sub>                | -92.336196   | -7.4                     | -92.602500           | 0.090036 | 0.096172           | -16.8                    |
| <b>4c</b> | 1,2- <i>cis</i> -B <sub>2</sub> H <sub>4</sub> Me <sub>2</sub>   | -131.575016  | -64.5                    | -131.936681          | 0.118081 | 0.125456           | -76.6                    |
| <b>4d</b> | 1,2- <i>trans</i> -B <sub>2</sub> H <sub>4</sub> Me <sub>2</sub> | -131.572936  | -59.0                    | -131.935076          | 0.118584 | 0.125869           | -71.3                    |
| <b>4e</b> | B <sub>2</sub> H <sub>3</sub> Me <sub>3</sub>                    | -131.573287  | -59.9                    | -131.935479          | 0.118520 | 0.125970           | -72.1                    |
| <b>4f</b> | B <sub>2</sub> H <sub>2</sub> Me <sub>4</sub>                    | -170.811085  | -114.3                   | -171.268753          | 0.146297 | 0.155372           | -129.2                   |
| <b>4g</b> | BH <sub>2</sub> OH                                               | -210.048178  | -166.8                   | -210.600993          | 0.173958 | 0.184531           | -184.3                   |
| <b>5a</b> | BH <sub>2</sub> (OMe)                                            | -101.742245  | -271.9                   | -101.950826          | 0.034827 | 0.038829           | -274.0                   |
| <b>5b</b> | BH <sub>2</sub> (OEt)                                            | -140.949456  | -246.0                   | -141.251235          | 0.062610 | 0.067848           | -245.8                   |
| <b>5c</b> | BH <sub>2</sub> (OPh)                                            | -180.179013  | -278.7                   | -180.575580          | 0.090611 | 0.096984           | -280.2                   |
| <b>5d</b> | BHMe(OH)                                                         | -332.341437  | -115.8                   | -333.023928          | 0.114665 | 0.122508           | -121.3                   |
| <b>5e</b> | BHMe(OMe)                                                        | -140.985843  | -341.5                   | -141.290281          | 0.062872 | 0.068231           | -347.3                   |

Table S3. Continued.

| Molecule | Chemical Formula <sup>a</sup>                                         | CBS-QB3     |                                   |                      | W1X-1    |                          |                                   |
|----------|-----------------------------------------------------------------------|-------------|-----------------------------------|----------------------|----------|--------------------------|-----------------------------------|
|          |                                                                       | H 298 K     | $\Delta_{\text{H}}^{\circ}$ 298 K | $E_{\text{tot}}$ 0 K | ZPE      | $\Delta\text{H}$ 0–298 K | $\Delta_{\text{H}}^{\circ}$ 298 K |
| 5f       | BH <sub>2</sub> Et(OH)                                                | -180.206617 | -351.2                            | -180.606024          | 0.091270 | 0.097785                 | -358.0                            |
| 5g       | BHPh(OH)                                                              | -332.373400 | -199.7                            | -333.060286          | 0.116991 | 0.124849                 | -210.6                            |
| 5h       | BHMe(OMe)                                                             | -180.192712 | -314.7                            | -180.590217          | 0.090288 | 0.097223                 | -318.0                            |
| 5i       | BH <sub>2</sub> Et(OMe)                                               | -219.413666 | -324.8                            | -219.906093          | 0.118637 | 0.126784                 | -329.0                            |
| 5j       | BHPh(OMe)                                                             | -371.580575 | -173.7                            | -372.360502          | 0.144250 | 0.153851                 | -182.0                            |
| 5k       | BMe <sub>2</sub> (OH)                                                 | -180.227613 | -406.3                            | -180.627491          | 0.090496 | 0.097553                 | -415.0                            |
| 5l       | BMe <sub>2</sub> (OMe)                                                | -219.433058 | -375.7                            | -219.925849          | 0.117762 | 0.126480                 | -381.7                            |
| 5m       | B <sub>2</sub> EtMe(OH)                                               | -219.448802 | -417.1                            | -219.943828          | 0.118873 | 0.127120                 | -427.2                            |
| 5n       | BMePh(OH)                                                             | -371.615272 | -264.8                            | -372.397398          | 0.144431 | 0.154110                 | -278.2                            |
| 5o       | BMePh(OMe)                                                            | -410.820655 | -234.1                            | -411.695719          | 0.171651 | 0.183110                 | -244.6                            |
| 6a       | BH(OH) <sub>2</sub>                                                   | -176.963929 | -642.5                            | -177.298995          | 0.041865 | 0.046429                 | -646.3                            |
| 6b       | BH(OMe) <sub>2</sub>                                                  | -255.375035 | -581.9                            | -255.896212          | 0.096884 | 0.104728                 | -579.8                            |
| 6c       | BH( <sup>i</sup> PrO) <sub>2</sub>                                    | -412.294729 | -716.7                            | -413.193325          | 0.207047 | 0.220097                 | -719.7                            |
| 6d       | BMe(OH) <sub>2</sub>                                                  | -216.205682 | -707.3                            | -216.636039          | 0.069466 | 0.075736                 | -713.6                            |
| 6e       | BMe(OH)(OMe)                                                          | -255.411197 | -676.9                            | -255.934504          | 0.096854 | 0.104851                 | -680.0                            |
| 6f       | BMe(OMe) <sub>2</sub>                                                 | -294.616636 | -646.3                            | -295.232753          | 0.124304 | 0.133924                 | -646.1                            |
| 6g       | BMe(OEt)(OMe)                                                         | -333.846250 | -679.2                            | -334.557042          | 0.152193 | 0.163028                 | -680.4                            |
| 6h       | BMe(OEt) <sub>2</sub>                                                 | -373.075585 | -711.3                            | -373.881085          | 0.180055 | 0.192232                 | -713.8                            |
| 6i       | B <sub>2</sub> Et(OH) <sub>2</sub>                                    | -255.426619 | -717.4                            | -255.951939          | 0.097887 | 0.105249                 | -724.8                            |
| 6j       | B <sub>2</sub> Et(OH)(OMe)                                            | -294.632085 | -686.9                            | -295.250327          | 0.125244 | 0.134407                 | -690.9                            |
| 6k       | B <sub>2</sub> Et(OMe) <sub>2</sub>                                   | -333.837511 | -656.2                            | -334.548417          | 0.152616 | 0.163507                 | -656.5                            |
| 6l       | BVi(OH) <sub>2</sub>                                                  | -254.218550 | -593.7                            | -254.720410          | 0.075492 | 0.082253                 | -600.7                            |
| 6m       | BVi(OH)(OMe)                                                          | -293.424147 | -563.6                            | -294.018947          | 0.102682 | 0.111320                 | -567.5                            |
| 6n       | BVi(OMe) <sub>2</sub>                                                 | -332.628871 | -531.1                            | -333.316686          | 0.130344 | 0.140598                 | -531.7                            |
| 6o       | B(AlI)(OH) <sub>2</sub>                                               | -293.444941 | -618.2                            | -294.041527          | 0.103148 | 0.111148                 | -627.3                            |
| 6p       | B(AlI)(OH)(OMe)                                                       | -332.650656 | -588.3                            | -333.340222          | 0.130482 | 0.140307                 | -594.2                            |
| 6q       | B(AlI)(OMe) <sub>2</sub>                                              | -371.853250 | -550.2                            | -372.635372          | 0.157458 | 0.169148                 | -552.7                            |
| 6r       | BPh(OH) <sub>2</sub>                                                  | -407.592118 | -562.6                            | -408.403978          | 0.122969 | 0.131933                 | -572.6                            |
| 6s       | BPh(OH)(OMe)                                                          | -446.797933 | -532.9                            | -447.702788          | 0.150347 | 0.161113                 | -539.8                            |
| 6t       | BPh(OMe) <sub>2</sub>                                                 | -486.000215 | -494.1                            | -486.998061          | 0.178027 | 0.190357                 | -497.6                            |
| 6u       | B( <i>p</i> -Tol)(OH) <sub>2</sub>                                    | -446.821508 | -594.8                            | -447.727376          | 0.149677 | 0.160566                 | -605.8                            |
| 6v       | B( <i>p</i> -Tol)(OH)(OMe)                                            | -486.027275 | -565.1                            | -487.026126          | 0.177046 | 0.189742                 | -572.9                            |
| 6w       | B( <i>p</i> -Tol)(OMe) <sub>2</sub>                                   | -525.229467 | -526.0                            | -526.321321          | 0.204758 | 0.219000                 | -530.4                            |
| 7a       | B(OH) <sub>3</sub>                                                    | -252.179860 | -998.0                            | -252.640361          | 0.048152 | 0.053516                 | -1002.1                           |
| 7b       | B(OH) <sub>2</sub> (OMe)                                              | -291.385048 | -966.8                            | -291.938524          | 0.075582 | 0.082730                 | -967.6                            |
| 7c       | B(OH) <sub>2</sub> (OPh)                                              | -482.776995 | -836.5                            | -483.711060          | 0.127457 | 0.137301                 | -842.9                            |
| 7d       | B(OH)(OMe) <sub>2</sub>                                               | -330.590349 | -935.8                            | -331.236706          | 0.103002 | 0.111925                 | -933.1                            |
| 7e       | B(OH)(OMe)(OPh)                                                       | -521.982633 | -806.4                            | -523.009563          | 0.154814 | 0.166516                 | -809.2                            |
| 7f       | B(OMe) <sub>3</sub>                                                   | -369.795855 | -905.4                            | -370.534891          | 0.130412 | 0.141107                 | -898.6                            |
| 7g       | B(OEt)(OMe) <sub>2</sub>                                              | -409.025265 | -937.7                            | -409.859069          | 0.158304 | 0.170202                 | -932.7                            |
| 7h       | B(OMe) <sub>2</sub> (OPh)                                             | -561.188304 | -776.5                            | -562.307992          | 0.182165 | 0.195688                 | -775.5                            |
| 7i       | B(OEt) <sub>2</sub> (OMe)                                             | -448.254793 | -970.4                            | -449.183257          | 0.186161 | 0.199291                 | -966.8                            |
| 7j       | B(OMe)(OPh) <sub>2</sub>                                              | -752.581145 | -648.5                            | -754.081156          | 0.233857 | 0.250249                 | -652.5                            |
| 7k       | B(OEt) <sub>3</sub>                                                   | -487.484324 | -1003.0                           | -488.507440          | 0.214023 | 0.228385                 | -1000.8                           |
| 8a       | C <sub>6</sub> H <sub>4</sub> O <sub>2</sub> BH                       | -406.371769 | -406.7                            | -407.156359          | 0.100872 | 0.107878                 | -409.1                            |
| 8b       | C <sub>6</sub> H <sub>4</sub> O <sub>2</sub> BMe                      | -445.616339 | -478.8                            | -446.495817          | 0.127999 | 0.137108                 | -482.9                            |
| 8c       | 3-C <sub>6</sub> H <sub>3</sub> FO <sub>2</sub> BMe                   | -544.777394 | -662.6                            | -545.809076          | 0.120029 | 0.130011                 | -662.3                            |
| 8d       | 4-C <sub>6</sub> H <sub>3</sub> FO <sub>2</sub> BMe                   | -544.781329 | -672.9                            | -545.813020          | 0.119864 | 0.129818                 | -673.1                            |
| 8e       | 3,4-C <sub>6</sub> H <sub>2</sub> F <sub>2</sub> O <sub>2</sub> BMe   | -643.936335 | -840.8                            | -645.119663          | 0.111965 | 0.122865                 | -834.8                            |
| 8f       | 3,5-C <sub>6</sub> H <sub>2</sub> F <sub>2</sub> O <sub>2</sub> BMe   | -643.941285 | -853.8                            | -645.125199          | 0.111846 | 0.122712                 | -849.7                            |
| 8g       | 3,6-C <sub>6</sub> H <sub>2</sub> F <sub>2</sub> O <sub>2</sub> BMe   | -643.937350 | -843.5                            | -645.120501          | 0.112016 | 0.122886                 | -836.9                            |
| 8h       | 4,5-C <sub>6</sub> H <sub>2</sub> F <sub>2</sub> O <sub>2</sub> BMe   | -643.940103 | -850.7                            | -645.123408          | 0.111797 | 0.122638                 | -845.2                            |
| 8i       | 3,4,5-C <sub>6</sub> H <sub>2</sub> F <sub>2</sub> O <sub>2</sub> BMe | -743.093405 | -1014.1                           | -744.429136          | 0.103877 | 0.115725                 | -1004.3                           |
| 8j       | 3,4,6-C <sub>6</sub> H <sub>2</sub> F <sub>2</sub> O <sub>2</sub> BMe | -743.094470 | -1016.9                           | -744.430099          | 0.103919 | 0.115741                 | -1006.8                           |

Table S3. Continued.

| Molecule  | Chemical Formula <sup>a</sup>                    | CBS-QB3      |                          |                      | W1X-1    |                    |                          |
|-----------|--------------------------------------------------|--------------|--------------------------|----------------------|----------|--------------------|--------------------------|
|           |                                                  | H 298 K      | $\Delta_f H^\circ$ 298 K | E <sub>tot</sub> 0 K | ZPE      | $\Delta H$ 0–298 K | $\Delta_f H^\circ$ 298 K |
| <b>8k</b> | C <sub>6</sub> F <sub>4</sub> O <sub>2</sub> BMe | -842.245787  | -1175.1                  | -843.733203          | 0.095954 | 0.108799           | -1159.1                  |
| <b>9a</b> | BH <sub>2</sub> NH <sub>2</sub>                  | -81.867053   | -79.3                    | -82.057006           | 0.047218 | 0.051405           | -81.9                    |
| <b>9b</b> | BH <sub>2</sub> NHMe                             | -121.080686  | -70.2                    | -121.364769          | 0.075325 | 0.080612           | -72.6                    |
| <b>9c</b> | BH <sub>2</sub> NMe <sub>2</sub>                 | -160.298671  | -72.6                    | -160.676037          | 0.102939 | 0.110748           | -70.0                    |
| <b>9d</b> | BHMeNH <sub>2</sub>                              | -121.107460  | -140.5                   | -121.393293          | 0.075248 | 0.080787           | -147.0                   |
| <b>9e</b> | BMe <sub>2</sub> NH <sub>2</sub>                 | -160.347750  | -201.4                   | -160.729100          | 0.102870 | 0.110096           | -211.0                   |
| <b>10</b> | BH(NMe <sub>2</sub> ) <sub>2</sub>               | -294.044512  | -159.1                   | -294.716279          | 0.176298 | 0.186884           | -160.2                   |
| <b>11</b> | B(NMe <sub>2</sub> ) <sub>3</sub>                | -427.788792  | -241.5                   | -428.752742          | 0.248621 | 0.263351           | -239.6                   |
| <b>12</b> | B(SMe) <sub>3</sub>                              | -1337.569622 | -199.7                   | -1341.851469         | 0.119859 | 0.131917           | -199.1                   |
| <b>13</b> | B <sub>3</sub> N <sub>3</sub> H <sub>6</sub>     | -242.210687  | -480.8                   | -242.726208          | 0.091836 | 0.098053           | -495.7                   |

<sup>a</sup> Used abbreviations: Me = methyl, Et = ethyl, Pr = propyl, <sup>i</sup>Pr = isopropyl, Bu = butyl, <sup>s</sup>Bu = *sec*-butyl, <sup>t</sup>Bu = *tert*-butyl, Vi = vinyl, All = allyl, Ph = phenyl, *p*-Tol = *para*-tolyl.
